# Supplementary material for: Comparison of two water oxidation electrocatalysts by copper or zinc supermolecule complexes based on porphyrin ligand
Source: Royal Society of Chemistry journal article supplement (doi:10.1039/c8ra08338j), 2018-01-01
Supplement: c8ra08338j1.pdf [file c8ra08338j1.pdf]

# **Supporting Information**

## **Comparison of Two Water Oxidation Electrocatalysts by Copper or Zinc Supramolecule Complexes based on Porphyrin Ligand**

Zhaodi Huang,<sup>a</sup> Meixi Zhang,<sup>a</sup> Huan Lin,<sup>a</sup> Shuo Ding,<sup>a</sup> Bin Dong,<sup>a</sup> Di Liu,<sup>c</sup> Hong Wang,<sup>\*b</sup> Fangna Dai,<sup>\*a</sup> Daofeng Sun<sup>a</sup>

<sup>a</sup> School of Materials Science and Engineering, College of Science, China University of Petroleum (East China), Qingdao, Shandong, 266580, People's Republic of China.

<sup>b</sup> School of Materials Science and Engineering, Beijing University of Chemical Technology, Beijing, 100029, People's Republic of China.

<sup>c</sup> School of Chemical and Environmental Engineering, Shandong University of Science and Technology, Qingdao, Shandong, 266590, People's Republic of China.

E-mail: [fndai@upc.edu.cn](mailto:fndai@upc.edu.cn); [wanghong@mail.buct.edu.cn](mailto:wanghong@mail.buct.edu.cn).

## Ligand Synthesis

0.565 g (8.46 mmol) of 4-formylbenzonitrile were added to 500 mL of dry  $\text{CH}_2\text{Cl}_2$  under  $\text{N}_2$  and continue to stirred 20 min to remove the air contained in the solution. 0.3 ml of pyrrole was added to the above mixture, after stirring for 30 min, 52.5  $\mu\text{L}$  of  $\text{BF}_3 \cdot \text{OEt}_2$  (0.85 mmol) was added via syringe, and the reaction mixture was protected from light with tin foil. After stirring at room temperature for 2 h, 0.78 g (0.37 mmol) of p-chloranil was added in the solid form and the solution was refluxed for 4 h. After the reaction mixture was cooled to room temperature, the residue was subjected to column chromatography on silica gel eluted with  $\text{CHCl}_3$  to give 5, 10, 15, 20-Tetrakis(4-cyanophenyl) porphyrin (CNTCPP), yield 20%.  $^1\text{H NMR}$  ( $\text{CDCl}_3$ )  $\delta$  8.84 (s, 8H), 8.35 (d, 8H), 8.12 (d, 8H).

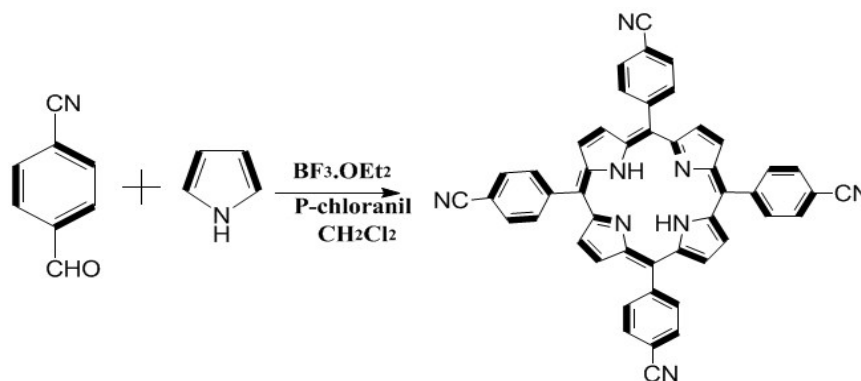

**Fig. S1** Synthesis of CNTCPP ligand.

## Synthesis of Cu-CNTCPP

A mixture of CNTCPP (20.0 mg, 0.028 mmol) and  $\text{CuCl}_2 \cdot 2\text{H}_2\text{O}$  (20.0 mg, 0.12 mmol) in a solvent of DMF (15.0 mL) was heated in a sealed Teflon stainless steel autoclave to 80  $^\circ\text{C}$  for 3 days. Deep violet crystals of **Cu-CNTCPP** were filtered, washed with EtOH, and dried at room temperature. Yield: 30%, based on CNTCPP. Anal. Calcd. for Cu-CNTCPP (%): C, 70.31; H, 4.15; N, 15.18. Found (%): C, 70.02; H, 4.65; N, 18.09.

## Synthesis of Zn-CNTCPP

A mixture of CNTCPP (20.0 mg, 0.028 mmol) and  $\text{ZnCl}_2$  (20.0 mg, 0.15 mmol) in a mixed solvent of DMF/EtOH (V:V=2:1, 1.0 mL) was heated in a sealed glas tube to

120 °C for 3000 min. Deep brownish crystals of **Zn-CNTCPP** were filtered, washed with EtOH and dried at room temperature. Yield: 25%, based on CNTCPP. Anal. Calcd. for Zn-CNTCPP (%): C, 74.09; H, 3.11; N, 14.40. Found (%): C, 74.52; H, 3.65; N, 14.02.

Table S1. Crystal data for complex of **Cu-CNTCPP**.

|                                    |                                                                  |
|------------------------------------|------------------------------------------------------------------|
| Empirical formula                  | C <sub>54</sub> H <sub>38</sub> CuN <sub>10</sub> O <sub>2</sub> |
| Formula weight                     | 922.48                                                           |
| Temperature/K                      | 294.07 (10)                                                      |
| Crystal system                     | monoclinic                                                       |
| Space group                        | <i>P</i> 2 <sub>1</sub> /n                                       |
| a/Å                                | 15.3680 (2)                                                      |
| b/Å                                | 17.1635 (2)                                                      |
| c/Å                                | 33.5945 (6)                                                      |
| α /°                               | 90.00                                                            |
| β /°                               | 93.8490 (10)                                                     |
| γ /°                               | 90.00                                                            |
| Volume/Å <sup>3</sup>              | 8841.2 (2)                                                       |
| Z                                  | 8                                                                |
| ρ <sub>calc</sub> /cm <sup>3</sup> | 1.386                                                            |
| μ /mm <sup>-1</sup>                | 1.148                                                            |
| F(000)                             | 3816                                                             |
| Crystal size/mm <sup>3</sup>       | 0.2 × 0.15 × 0.1                                                 |
| Radiation                          | Cu Kα (λ = 1.54178)                                              |
| 2θ range for data collection/°     | 2.892 to 70.437                                                  |
| Index ranges                       | -18 ≤ h ≤ 11, -15 ≤ k ≤ 20, -40 ≤ l ≤ 40                         |
| Reflections collected              | 37932                                                            |
| Independent reflections            | 16592 [R <sub>int</sub> = 0.0391]                                |
| Data/restraints/parameters         | 16592/0/1232                                                     |
| Goodness-of-fit on F <sup>2</sup>  | 1.054                                                            |
| Final R indexes [I > 2σ (I)]       | R <sub>1</sub> = 0.1020, wR <sub>2</sub> = 0.3093                |
| Final R indexes [all data]         | R <sub>1</sub> = 0.1271, wR <sub>2</sub> = 0.3318                |

Table S2. Crystal data for complex of **Zn-CNTCPP**.

|                                                                   |                                                                                             |
|-------------------------------------------------------------------|---------------------------------------------------------------------------------------------|
| Empirical formula                                                 | C <sub>48</sub> H <sub>24</sub> N <sub>8</sub> Zn                                           |
| Formula weight                                                    | 778.12                                                                                      |
| Temperature/K                                                     | 293(2)                                                                                      |
| Crystal system                                                    | monoclinic                                                                                  |
| Space group                                                       | <i>P</i> 2 <sub>1</sub> / <i>n</i>                                                          |
| <i>a</i> /Å                                                       | 9.7858(3)                                                                                   |
| <i>b</i> /Å                                                       | 9.3797(2)                                                                                   |
| <i>c</i> /Å                                                       | 21.3172(5)                                                                                  |
| $\alpha$ /°                                                       | 90.00                                                                                       |
| $\beta$ /°                                                        | 100.777(3)                                                                                  |
| $\gamma$ /°                                                       | 90.00                                                                                       |
| Volume/Å <sup>3</sup>                                             | 1922.15(9)                                                                                  |
| <i>Z</i>                                                          | 2                                                                                           |
| $\rho_{\text{calc}}$ /g/cm <sup>3</sup>                           | 1.344                                                                                       |
| $\mu$ /mm <sup>-1</sup>                                           | 0.685                                                                                       |
| <i>F</i> (000)                                                    | 796.0                                                                                       |
| Radiation                                                         | Mo K $\alpha$ ( $\lambda$ = 0.71073)                                                        |
| 2 $\Theta$ range for data collection/°                            | 6.06 to 52.74                                                                               |
| Index ranges                                                      | -12 $\leq$ <i>h</i> $\leq$ 12, -11 $\leq$ <i>k</i> $\leq$ 11, -26 $\leq$ <i>l</i> $\leq$ 26 |
| Independent reflections                                           | 3927 [ <i>R</i> <sub>int</sub> = 0.0227, <i>R</i> <sub>sigma</sub> = 0.0301]                |
| Data/restraints/parameters                                        | 3927/0/259                                                                                  |
| Goodness-of-fit on <i>F</i> <sup>2</sup>                          | 1.060                                                                                       |
| Final <i>R</i> indexes [ <i>I</i> $\geq$ 2 $\sigma$ ( <i>I</i> )] | <i>R</i> <sub>1</sub> = 0.0446, <i>wR</i> <sub>2</sub> = 0.1323                             |
| Final <i>R</i> indexes [all data]                                 | <i>R</i> <sub>1</sub> = 0.0543, <i>wR</i> <sub>2</sub> = 0.1403                             |

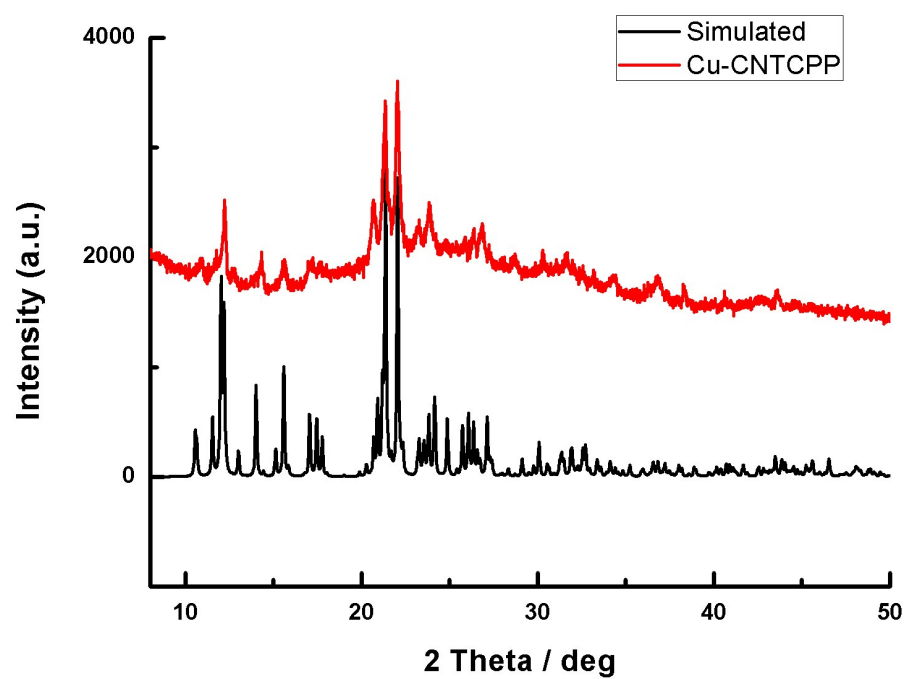

**Fig. S2 XRD of Cu-CNTCPP.**

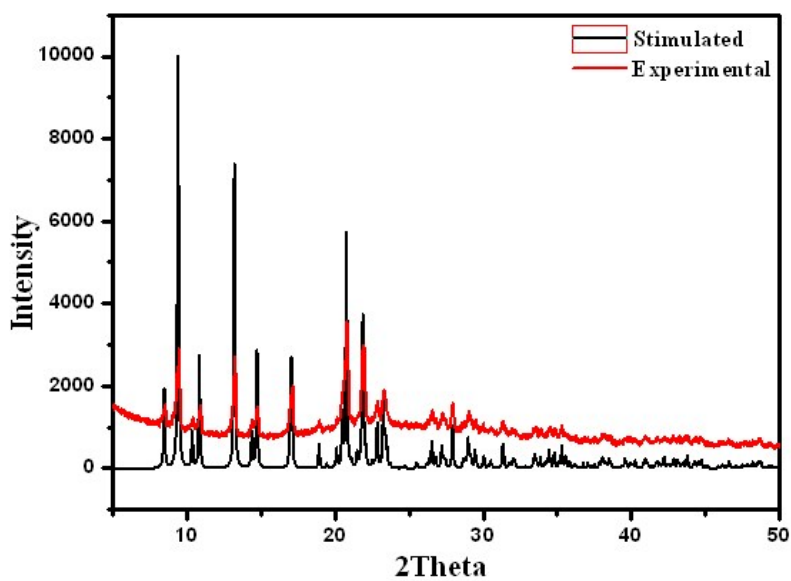

**Fig. S3 XRD of Zn-CNTCPP.**

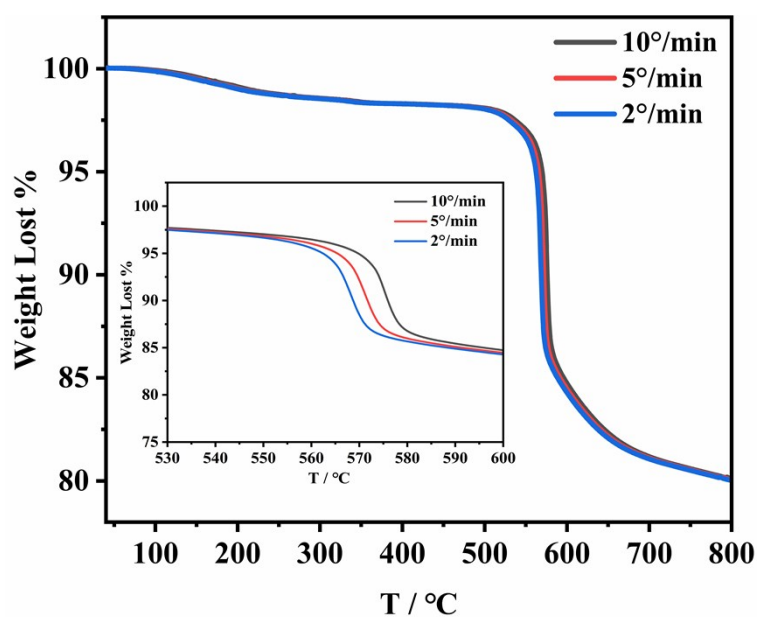

**Fig. S4** TGA curve of **Cu-CNTCPP**.

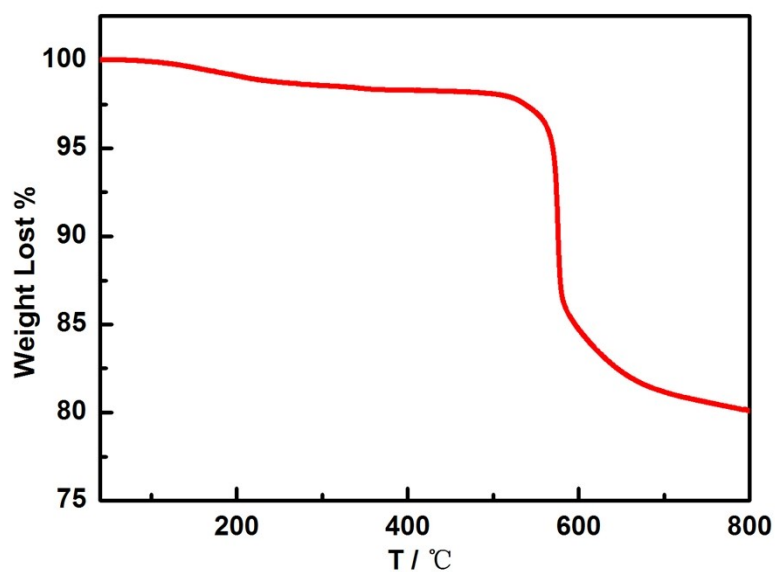

**Fig. S5** TGA curve of **Zn-CNTCPP**.

**Method for electrochemical measurements:** The glassy carbon electrode (GCE) as work electrode with the diameter of 4.0 mm (Gamry Reference 600 Instruments, USA) was polished with alumina slurry and cleaned with ethanol and DI water. A conventional three-electrode system was used with SCE (saturated KCl) as the reference electrode and Pt foil as counter electrode. The potential values are corrected to the reverse hydrogen electrode (RHE) according the equation  $E(\text{RHE})=E$

(SCE)+0.245+0.0591pH V. Typically, 5.0 mg of sample and 20.0  $\mu\text{L}$  Nafion solution (5 wt%) were dispersed in mixed solution containing deionized water and ethanol with volume ratio of 1:1 by sonicating for 1 h to form a homogeneous ink. Then 5.0  $\mu\text{L}$  of the dispersion was loaded onto a glassy carbon electrode. The cathodic current density was calculated by the geometric area of GCE which is 0.1256  $\text{cm}^2$ . Prior to each electrochemical measurement, the electrolyte solution was purified with  $\text{O}_2$  for 30 min to saturate the electrolyte and the  $\text{O}_2$  flow was maintained over the solution during the test. Linear sweep voltammogram curves were examined in 1.0 M KOH (pH=14). The scan rate is 20  $\text{mV}\cdot\text{s}^{-1}$  and the scan region ranges from 0 to 0.8 V vs SCE, AC impedance spectra for different electro-catalysts at overpotential of 0.65 V vs SCE from  $10^5$  to  $10^{-2}$  Hz with an AC voltage of 5 mV.

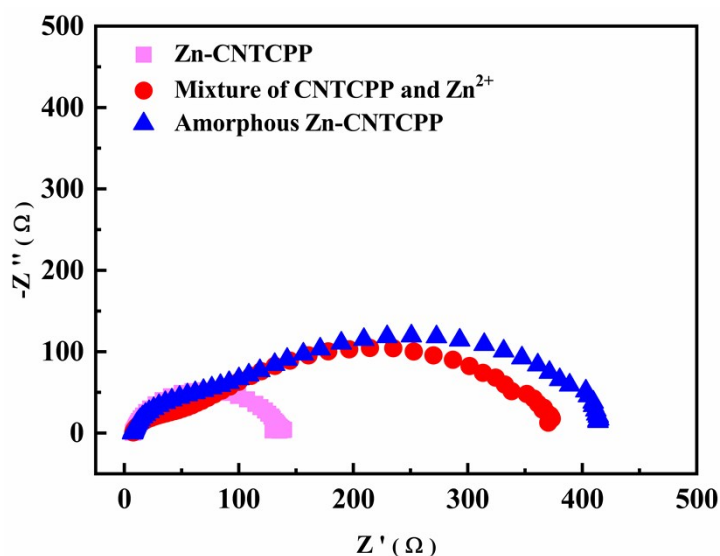

**Fig. S6** Nyquist plots examined at 0.5 V (vs SCE) for **Zn-CNTCPP**.
